# Supplementary material for: Impact of Doxorubicin on Cell-Substrate Topology
Source: MDPI journal article supplement (doi:10.3390/ijms23116277), 2022-06-03
Supplement: s1 [file s1]

## Supplementary Material

### 1. Dependence of fluorescence intensity with increasing TIRF angle

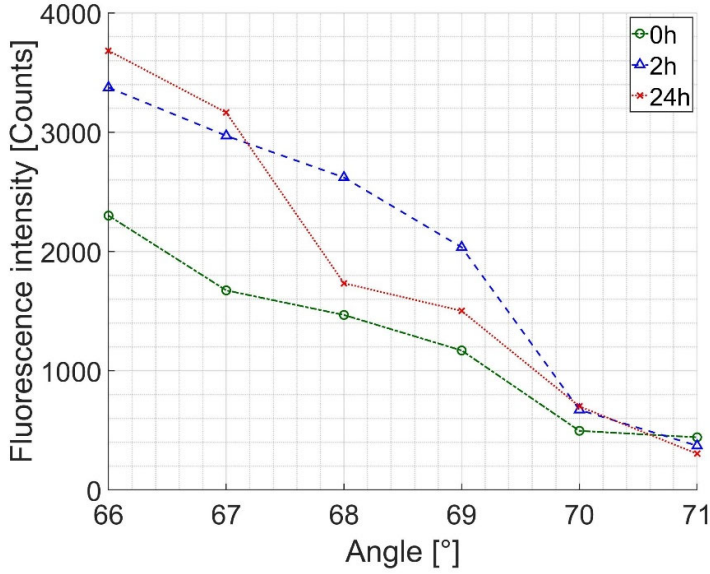

Supplementary Figure S1. Fluorescence intensity measured in the emission maximum (530 nm) of representative samples of CHO-pAcGFP1-Mem cells after 0 h, 2 h, and 24 h incubation with doxorubicin at various TIRF angles (limited to  $66^\circ \leq \Theta \leq 71^\circ$  for reasons of clarity).

### 2. Calculation of cell-substrate distances

Absorbed intensity of light (propagating in z-direction) in a thin layer dz:  $dI/dz = \varepsilon(\lambda) \ln 10 c(z) I(z)$

with  $\varepsilon(\lambda)$  = decadic extinction coefficient,  $c(z)$  = absorber concentration,  $I(z)$  = light intensity.

Absorbed light intensity of an evanescent wave:  $dI/dz = \varepsilon(\lambda) \ln 10 c(z) I_e (n_2/n_1) T(\Theta) e^{-z/d(\Theta)}$

with  $I_e$  = incident intensity,  $n_2$  = refractive index of the cell,  $n_1$  = refractive index of the substrate,  $T(\Theta)$  = transmission factor between cell and substrate,  $d(\Theta)$  = penetration depth of the evanescent wave.

Fluorescence excited by the evanescent wave:  $I_F(\Theta) = \varepsilon(\lambda) \ln 10 \eta (\Omega/4\pi) I_e (n_2/n_1) T(\Theta) \int c(z) e^{-z/d(\Theta)} dz = I_F(\Theta) = A T(\Theta) \int c(z) e^{-z/d(\Theta)} dz$

with  $\eta$  = quantum yield of fluorescence,  $\Omega$  = solid angle of detection,  $A = \varepsilon(\lambda) \ln 10 \eta (\Omega/4\pi) I_e (n_2/n_1)$ .

Fluorescence integrated over a thin layer with thickness  $t$  and constant concentration  $c$  at a distance  $\Delta$  from the substrate:  $I_F = A c T(\Theta) t e^{-\Delta/d(\Theta)}$ .

Evaluation of  $\ln [I_F / T(\Theta)]$  over  $1/d(\Theta)$  results in a linear function with the slope  $-\Delta$ .

As discussed previously [17], the relevant refractive index of the cell is that of the cytoplasm, if the layer  $t$  (cell membrane) is very thin, and if the cell-substrate distance  $\Delta$  is smaller than the wavelength of light.

### 3. Comparative experiments of MCF-7 breast cancer cells

MCF-7 human breast cancer cells were obtained from Cell Lines Service (CLS No. 00273, Eppelheim, Germany) and grown in DMEM/HAM F-12 medium (No. 9031.1, Carl Roth GmbH, Munich, Germany) supplemented with 10% fetal calf serum and antibiotics at 37 °C and 5% CO<sub>2</sub>. Subcultures with 49–52 cell splittings were used for seeding 120 cells/mm<sup>2</sup> on glass slides and growing them for 72 h in quadriPERM cell culture vessels containing cultivation medium. Prior to the microscopy experiments, cells were incubated for 1 h with the fluorescent membrane marker laurdan (8 µM), and part of them was coincubated for 2 h with medium containing 2 µM doxorubicin. Finally, the glass slides were rinsed with Earle's Balanced Salt Solution (EBSS). Cells incubated only with laurdan, but not with doxorubicin ("0 h") were used as a reference.

For Variable-Angle Total Internal Reflection Microscopy (VA-TIRFM), the same setup as described in the manuscript was used together with a super-continuum fiber laser (SuperK EXTREME with SuperK VARIA tunable single-line filter, NKT Photonics, Birkerød, Denmark) operated at (440 ± 10) nm, using a 40×/ 0.60 long-distance microscope objective lens and a 475-nm long-pass filter for fluorescence detection. This setup permitted to excite laurdan in its longwave absorption tail and to detect the longwave part of its fluorescence [1]. Fluorescence spectra were recorded by an optical multichannel analyzer (IMD4562, Hamamatsu Photonics, Ichino-Cho, Japan) combined with a purpose-made polychromator, which permitted a spectral resolution of about 10 nm. Corresponding images were recorded by a CCD camera (AxioCam MRc, Zeiss, Germany) and integrated for up to 20 seconds. Fluorescence intensity was determined in the spectral band of 500–520 nm upon variation of the angle  $\Theta$  ( $66^\circ \leq \Theta \leq 75^\circ$ ), and calculation of cell-substrate distances was performed in a similar way as reported for CHO-pAcGFP1-Mem cells (using equations 2 and 3 of the manuscript with  $T(\Theta)$  corresponding now to an "effective" transmission factor for unpolarized light [2]). Fluorescence intensity was determined prior to ("0 h") and subsequent to (2 h) incubation with doxorubicin from 11 object fields of 25 µm × 200 µm each, and mean values ± standard deviations (including p-values of statistical significance) were determined as for the CHO-pAcGFP1-Mem cells. The result is documented in Figure 6 of the manuscript and discussed further there. Images recorded for individual angles served as a control, but their angular dependence was not evaluated quantitatively due the low signal-to-noise ratio.

Fluorescence spectra of MCF-7 human breast cancer cells are documented in Supplementary Figure 2 upon whole-cell illumination ( $\Theta = 62^\circ \leq \Theta_c$ ) and TIRFM ( $\Theta = 66^\circ \geq \Theta_c$ ) prior to (0 h) and subsequent to (2 h) incubation with doxorubicin. Upon whole-cell illumination, the longwave laurdan fluorescence is clearly documented, and upon incubation with doxorubicin a strong overlap by its fluorescence or by the fluorescence of its degradation product [3] becomes evident. The TIRFM spectra, however, primarily show the laurdan fluorescence with only very little overlap by doxorubicin. This proves that laurdan is mainly located in the plasma membrane; doxorubicin and its degradation product, however, are inside the cells.

#### References:

1. Parasassi, T.; de Stasio, G.; d'Ubaldo, A.; Gratton, E. Phase fluctuation in phospholipid membranes revealed by laurdan fluorescence. *Biophys. J.* **1990**, *57* (6), 1179–1186, doi: 10.1016/S0006-3495(90)82637-0.
2. Reichert, W.M.; Truskey, G.A. Total internal reflection fluorescence (TIRF) microscopy. (I) Modelling cell contact region fluorescence. *J. Cell Sci.* **1990**, *96*, 219–230, doi: 10.1242/jcs.96.2.219.
3. Hovorka, O.; Šubr, V.; Vetricka, D.; Kovar, L.; Strohalm, J.; Strohalm, M.; Benda, A.; Hof, M.; Ulbrich, K.; Rihova, B. Spectral analysis of doxorubicin accumulation and the indirect quantification of its DNA intercalation. *Eur. J. Pharm. Biopharm.* **2010**, *76*(3), 514–524, doi: 10.1016/j.ejpb.2010.07.008.

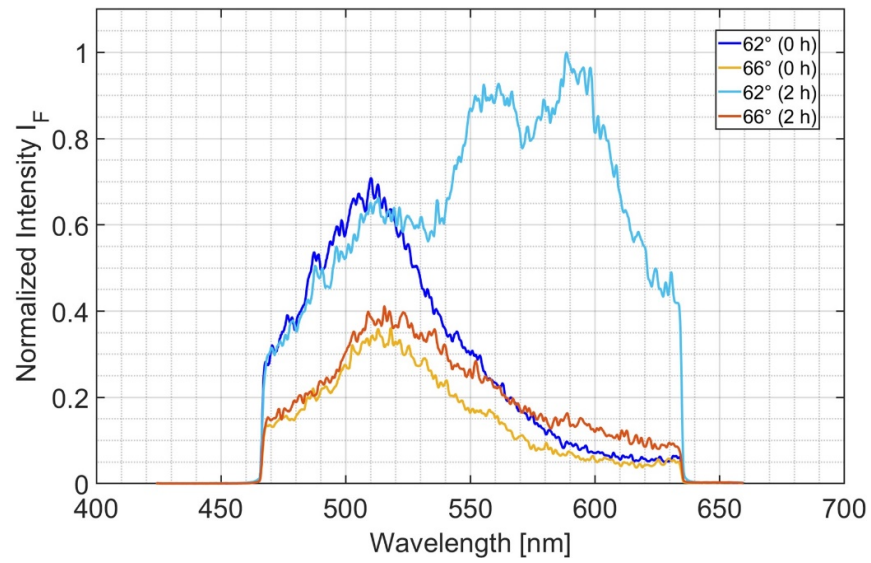

Supplementary Figure S2. Fluorescence spectra of MCF-7 human breast cancer cells incubated with the membrane marker laurdan (8  $\mu$ M, 1 h) prior to (0 h) and subsequent to (2 h) incubation with doxorubicin (2  $\mu$ M, 2 h) upon whole-cell illumination (62°) and TIRFM (66°).
